# Supplementary material for: Eco-engineered electrospun La/Rb-MOF/chitosan–PCL nanofibrous membrane for high-performance, recyclable, and sustainable Cr( vi ) removal from water
Source: Royal Society of Chemistry journal article supplement (doi:10.1039/d5ra06962a), 2025-01-01
Supplement: d5ra06962a1.pdf [file d5ra06962a1.pdf]

# **Eco-Engineered Electrospun La/Rb–MOF/Chitosan–PCL Nanofibrous Membrane for High-Performance, Recyclable, and Sustainable Cr(VI) Removal from Water**

Table S1. Chemical name, formula, and company

| Chemical name                    | Formula                  | Company                    |
|----------------------------------|--------------------------|----------------------------|
| Chitosan                         | $C_{56}H_{103}N_9O_3$    | Sigma-Aldrich, Germany     |
| polycaprolactone                 | $(C_6H_{10}O_2)_n$       | Sigma-Aldrich, Germany     |
| Lanthanum nitrate hexahydrate    | $La(NO_3)_3 \cdot 6H_2O$ | Sigma-Aldrich, Germany     |
| Rubidium chloride                | RbCl                     | Sigma-Aldrich, Germany     |
| benzene-1,3,5-tricarboxylic acid | $C_6H_3(CO_2H)_3$        | Sigma-Aldrich, Germany     |
| Methanol                         | $CH_3OH$                 | LOBA CHEMIE PVT.LTD, India |
| Ethanol                          | $C_2H_6O$                | Sigma-Aldrich, Germany     |
| Sodium hydroxide (99%, AR)       | NaOH                     | Chimmed, Russia            |
| Hydrochloric acid (37%, AR)      | HCl                      | LOBA CHEMIE PVT.LTD, India |

Table S2. Instruments and equipments.

| Test name                        | Abbreviation | Instrument name                                                                 | Company                                    | Illustration                                                                                                                                                                                                                         |
|----------------------------------|--------------|---------------------------------------------------------------------------------|--------------------------------------------|--------------------------------------------------------------------------------------------------------------------------------------------------------------------------------------------------------------------------------------|
| Fourier transformer infrared     | FT-IR        | A Nicolet IS10 Fourier transform infrared (FTIR) spectrometer                   | Thermo Fisher Scientific, Waltham, MA, USA | equipped with an attenuated total reflectance accessory and which ran in the 4000-400 $\text{cm}^{-1}$ range was used to gather FTIR spectra                                                                                         |
| Powered X-ray diffraction        | PXRD         | Siemens diffractometer (model D500, Germany)                                    | Germany                                    | patterns were captured from powder samples through the use of a Siemens diffractometer (model D500, Germany) that was fitted with a Cu-K radiation source (wavelength 1.54 Angstroms ( $\text{\AA}$ )) operating at 30 kV and 20 mA. |
| Scanning Electron Microscope     | SEM          | (JSM-6510LV, JEOL Ltd., Tokyo, Japan)                                           | JEOL Ltd., Tokyo, Japan                    | The morphology of the investigated sorbents was analyzed with the use of a scanning electron microscope                                                                                                                              |
| X-ray photoelectron spectroscopy | XPS          | K-ALPHA (Thermo Fisher Scientific, USA)                                         | Thermo Fisher Scientific, USA              | Used for determination the elemental analysis for the compound                                                                                                                                                                       |
| Braunauer Emmet Teller           | BET          | Quantachrome Instruments, Anton Paar Quantachrome, Inc., Boynton Beach, FL, USA | Quanta Tec, Inc., Boynton Beach, FL, USA   | was utilised for surface and pore analysis (Brunauer Emmett-Teller (BET) surface area, porous volume, and pore size), and NovaWin Software (v11.0) was used for data interpretation.                                                 |

|                                  |                                |                                                               |                                        |                                                                                                                                                                                                            |
|----------------------------------|--------------------------------|---------------------------------------------------------------|----------------------------------------|------------------------------------------------------------------------------------------------------------------------------------------------------------------------------------------------------------|
|                                  |                                | USA                                                           |                                        | The BET surface area of material adsorbents was obtained by the application of nitrogen adsorption-desorption isotherms at 77K through the use of a specific analyser (Quadratorb-EVO, Quantachrome, USA). |
| UV-visible spectrophotometer     | UV spectrophotometer           | HACH LANGE DR5000                                             | HACH LANGE Germany                     | Measuring the concentration of the adsorbate solution via using Beer Lambert law                                                                                                                           |
| Energy Dispersive X-ray          | EDX                            | Leo1430VP microscope                                          | Carl Zeiss AG, Jena, Germany           | Elemental analysis of the material                                                                                                                                                                         |
| Transmission electron microscopy | TEM                            | TEM, FEI Teanci G2 F20, USA                                   | FEI Teanci G2 F20, USA                 | Determination the morphology of the material and size                                                                                                                                                      |
| pH meter                         | pH                             | HANNA (model 211)                                             | USA                                    | Measuring the acidity or basicity of the solution                                                                                                                                                          |
| Sonication                       | Ultrasonic                     | Elmasonic P300H ultrasonic bath, continuous mode, power 380 W | Elma Schmidbauer GmbH, Singen, Germany | Sonication of the material as well as used to disperse material on the solution as it decreases the particle size of the material                                                                          |
| Water bath                       | Shaking                        | GFL Orbital Shaker 3017                                       |                                        |                                                                                                                                                                                                            |
| Atomic                           | atomic absorption spectrometer | SIMAA 6000                                                    |                                        | Determination metal concentration                                                                                                                                                                          |

Table S3. True variables, codes, and their BBD levels.

| Code | Variables   | -1   | 0    | +1  |
|------|-------------|------|------|-----|
| A    | pH          | 2    | 5    | 8   |
| B    | Dose (g)    | 0.02 | 0.25 | 0.5 |
| C    | Time (min.) | 5    | 55.5 | 100 |

Table S4. Equations used in this work to fit the data of adsorption experiments.

| Serial | Equation                                                                                                                           | Nmae                 | Description                                                                                                                                                                                                                                                                                                                                                                                                                                                                                                                                                                                                                                                                                                 | Ref. |
|--------|------------------------------------------------------------------------------------------------------------------------------------|----------------------|-------------------------------------------------------------------------------------------------------------------------------------------------------------------------------------------------------------------------------------------------------------------------------------------------------------------------------------------------------------------------------------------------------------------------------------------------------------------------------------------------------------------------------------------------------------------------------------------------------------------------------------------------------------------------------------------------------------|------|
| 1      | $q_e = \frac{q_m}{1 + K_L C_e}$                                                                                                    | Langmuir             | <p><math>q_e</math> (mg.g<sup>-1</sup>) Adsorption capacity, <math>C_e</math> equilibrium concentration, <math>q_m</math> (mg.g<sup>-1</sup>) is the monolayer saturation capacity constant and <math>K_L</math> (L/mg) is the Langmuir constant associated with the free adsorption energy.</p> <p>The favorability of the adsorption process in the Langmuir model is determined by means of the <math>R_L</math> dimensionless factor (<math>R_L = 1/(1 + k_L \cdot C_0)</math>) as follows: <math>R_L = 0</math>, <math>0 &lt; R_L &lt; 1</math>, <math>R_L = 1</math>, and <math>R_L &gt; 1</math> indicating irreversible, favorable, linear, and unfavorable adsorption isotherms, respectively.</p> | [1]  |
| 2      | $q_e = K_F C_e^{\frac{1}{n}}$                                                                                                      | Freundlich           | <p><math>K_F</math> Freundlich isotherm constants [(mg/g)/(mg/L)<sup>1/n</sup>], and <math>1/n</math> represents the exponent of non-linearity (i.e., C-type, L-type, and S-type isotherms). <math>n</math> is the Freundlich constants, and <math>n &lt; 1</math> indicates poor adsorption while <math>n = 1-2</math> and <math>n = 2-10</math> indicate average and good adsorptions, respectively. The values of <math>n</math> and <math>k_f</math> are calculated, respectively</p>                                                                                                                                                                                                                   | [2]  |
| 3      | $q_e = q_m \exp(-\beta \varepsilon^2)$ $\varepsilon = RT \ln \left( 1 + \frac{1}{C_e} \right)$ $E_{DR} = \sqrt{\frac{1}{2K_{DR}}}$ | Dubinin–Radushkevich | <p><math>q_D</math> is the maximum monolayer adsorption capacity (mg/g), <math>B_D</math> is the activity coefficient related to the apparent free energy of adsorbate adsorption onto the adsorbent (mol<sup>2</sup>/kJ<sup>2</sup>), <math>\varepsilon_D</math> is the Polanyi potential which is related to the equilibrium concentration, and <math>E</math> is the mean adsorption energy.</p>                                                                                                                                                                                                                                                                                                         | [3]  |
| 4      | $q_e = Q_{max} \frac{RT}{b \ln(K_T C_e)}$                                                                                          | Temkin               | <p><math>K_T</math> is the Temkin isotherm constant or equilibrium binding constant (L/mg) corresponding to the maximum binding energy, and <math>b_T</math> is the Temkin isotherm constant related to the heat of adsorbate adsorption onto the adsorbent due to adsorbent-adsorbate interaction (J/mol), <math>R</math> is the gas constant (8.314 J/mol/K), and <math>T</math> is the absolute temperature (herein 298 K).</p>                                                                                                                                                                                                                                                                          | [4]  |

|    |                                                                  |                             |                                                                                                                                                                                                                                                                                                  |      |
|----|------------------------------------------------------------------|-----------------------------|--------------------------------------------------------------------------------------------------------------------------------------------------------------------------------------------------------------------------------------------------------------------------------------------------|------|
|    | $q_e = \frac{q_m k_T c_e}{(1 + (K_L C_e) t) 1/t}$                | Toth                        | $q_e$ : amount of adsorbate adsorbed at equilibrium (mg/g), $C_e$ : equilibrium concentration of adsorbate in solution (mg/L) $q_{max}$ : theoretical maximum adsorption capacity (mg/g) $K_T$ : Toth isotherm constant related to affinity (L/mg) $t$ : heterogeneity parameter (dimensionless) | [5]  |
| 5  | $q_t = q_e (1 - e^{-k_1 t})$                                     | Pseudo-First-order kinetic  | $q_e$ and $q_t$ are the adsorption capacities at equilibrium and time $t$ (mg/g), and $k_1$ is the rate constant ( $\text{min}^{-1}$ ), respectively.                                                                                                                                            | [6]  |
| 6  | $q_t = \frac{t K_2 q_e^2}{1 + q_e K_2 t}$                        | Pseudo-Second-order kinetic | $k_2$ is the pseudo-second order constant ( $\text{mg}/(\text{g} \cdot \text{min})$ )                                                                                                                                                                                                            | [7]  |
| 7  | $q_t = K_i t^{1/2} + X$                                          | Intraparticle diffusion     | $q_t$ is the adsorption capacity at time $t$ in (mg/g), $k_{int}$ is the intraparticle diffusion rate constant ( $\text{mg} \cdot \text{g}^{-1} \cdot \text{min}^{-1/2}$ ), and $C$ is a constant related to the thickness of the boundary layer (mg/g).                                         | [8]  |
| 8  | $q_t = \frac{1}{\beta} \ln(\alpha \beta t + 1)$                  | Elovich                     | The constants $\alpha$ chemical adsorption rate ( $\text{mg} \cdot \text{g}^{-1} \cdot \text{min}^{-1}$ ), and $\beta$ Coefficient in relation with extension of covered surface                                                                                                                 | [9]  |
| 9  | $\Delta G^\circ = \Delta H^\circ - T \Delta S^\circ$             | Gibbs free energy           | $\Delta G^\circ$ : Gibbs free energy change; $K_d$ : equilibrium constant; $R$ : gas constant; $T$ : temperature.                                                                                                                                                                                | [10] |
| 10 | $\ln K_d = \frac{\Delta S^\circ}{R} - \frac{\Delta H^\circ}{RT}$ | Van't Hoff                  | $\Delta S^\circ$ : entropy change; $\Delta H^\circ$ : enthalpy change.                                                                                                                                                                                                                           | [11] |
| 11 | $\ln K_d = \ln A - \left(\frac{E_a}{R}\right) \frac{1}{T}$       | Arrhenius                   | $E_a$ was the activation energy, $A$ Arrhenius constant, $R$ ideal gas constant 8.314 J/mol K, $T$ (K) is the absolute solution temperature                                                                                                                                                      | [12] |

Table S5: Identification of the peaks of La 3d

| La-Rb-MOF/CS-PCL |       |                                                 | Cr@La-Rb-MOF/CS-PCL |       |                                                                            |
|------------------|-------|-------------------------------------------------|---------------------|-------|----------------------------------------------------------------------------|
| Bending energy   | %     | Identification                                  | Bending energy      | %     | Identification                                                             |
| 835.93           | 25.68 | La 3d <sub>5/2</sub> —La(III)—O (MOF lattice)   | 831.91              | 17.76 | La 3d <sub>5/2</sub> —La(III)—O (coordination altered after Cr adsorption) |
| 838.36           | 2.34  | La 3d <sub>5/2</sub> —Satellite/shake-up        | 836.32              | 10.84 | La 3d <sub>5/2</sub> —Satellite/shake-up due to ligand/electron transfer   |
| 839              | 26.55 | La 3d <sub>5/2</sub> —La(III)—O—C (carboxylate) | 840                 | 17.23 | La 3d <sub>5/2</sub> —La(III)—O—C (carboxylate, chelated ligand)           |
| 846.45           | 22.96 | La 3d <sub>3/2</sub> —La(III)—O (MOF lattice)   | 846.21              | 17.16 | La 3d <sub>3/2</sub> —La(III)—O (coordination altered after Cr adsorption) |
| 849.33           | 3.41  | La 3d <sub>3/2</sub> —Satellite/shake-up        | 850.88              | 15.62 | La 3d <sub>3/2</sub> —Satellite/shake-up due to ligand/electron transfer   |
| 851.87           | 15.31 | La 3d <sub>3/2</sub> —La(III)—O—C (chelated)    | 855.79              | 18.72 | La 3d <sub>3/2</sub> —La(III)—O—C (carboxylate, chelated ligand)           |
| 853.39           | 3.77  | La 3d <sub>3/2</sub> —Satellite/shake-up        | 856.04              | 2.67  | La 3d <sub>3/2</sub> —Satellite/shake-up due to ligand/electron transfer   |

Table S6. List of abbreviation.

| Symbol        | Definition                                                                                                       |
|---------------|------------------------------------------------------------------------------------------------------------------|
| $q_e$         | the adsorbed amount of dye at equilibrium concentration ( $\text{mg.g}^{-1}$ )                                   |
| $q_{mL}$      | the maximum sorption capacity (corresponding to the saturation of the monolayer, ( $\text{mg.g}^{-1}$ ))         |
| $K_L$         | Langmuir binding constant which is related to the energy of sorption ( $\text{L/mg}$ )                           |
| $C_e$         | is the equilibrium concentration of dyes in solution                                                             |
| $K_F$         | Freundlich constants related to the sorption capacity ( $\text{mg/g}$ ) ( $\text{L/mg}$ ) <sup>1/n</sup>         |
| $n$           | intensity                                                                                                        |
| $K_{DR}$      | constant related to the sorption energy ( $\text{mol}^2\text{k J}^{-2}$ )                                        |
| $q_{DR}$      | theoretical saturation capacity ( $\text{mg/g}$ )                                                                |
| $\varepsilon$ | Polanyi potential ( $\text{J}^2\text{mol}^{-2}$ )                                                                |
| $R$           | Gas constant ( $8.314 \text{ J.mol}^{-1}\text{K}^{-1}$ )                                                         |
| $T$           | temperature where the adsorption occurs                                                                          |
| $A_T$         | Temkin isotherm constant                                                                                         |
| $b_T$         | Temkin constant in relation to heat of adsorption ( $\text{J.mol}^{-1}$ )                                        |
| $q_t$         | is the amount of dye adsorbed ( $\text{mmol.g}^{-1}$ )                                                           |
| $K_1$         | Rate constant for Pseudo first order constant for the adsorption processes ( $\text{min}^{-1}$ )                 |
| $q_2$         | Maximum adsorption capacity for pseudo second order                                                              |
| $K_2$         | Rate constant for Pseudo first order constant for the adsorption processes ( $\text{g.mg}^{-1}\text{min}^{-1}$ ) |
| $\alpha$      | Chemical adsorption rate ( $\text{mg.g}^{-1}\text{min}^{-1}$ )                                                   |
| $\beta$       | Coefficient in relation with extension of covered surface                                                        |
| $\Delta G^0$  | Free Gibb's energy                                                                                               |
| $\Delta H^0$  | Enthalpy                                                                                                         |
| $\Delta S^0$  | Entropy                                                                                                          |
| $K_c$         | distribution coefficient                                                                                         |
| $C_{eq}$      | Concentration at equilibrium ( $\text{mg/L}$ )                                                                   |



Table S7. The parameter of the adsorption isotherm for Cr(VI) ions on La-Rb-MOF/CS-PCL

| Isotherm           | Value of parameters                            |             |
|--------------------|------------------------------------------------|-------------|
| Langmuir           | $q_{m \text{ exp}} \text{ (mg/g)}$             | 449.2       |
|                    | $q_m \text{ (mg/g)}$                           | 451.8       |
|                    | $K_L \text{ (L/mg)}$                           | 0.064       |
|                    | $R_L$                                          | 0.075       |
|                    | Reduced Chi-Sqr                                | 51.37029    |
|                    | Residual Sum of Squares                        | 821.92458   |
|                    | R-Square (COD)                                 | 0.99755     |
|                    | $R^2$                                          | 0.99739     |
| Freundlich         | $n$                                            | 2.96        |
|                    | $K_F \text{ (mg/g) (L/mg)}^{1/n}$              | 92.66       |
|                    | Reduced Chi-Sqr                                | 902.91751   |
|                    | Residual Sum of Squares                        | 14446.68013 |
|                    | R-Square (COD)                                 | 0.95689     |
|                    | $R^2$                                          | 0.9542      |
| Dubin–Radushkevich | $Q_{DR} \text{ (mg.g}^{-1}\text{)}$            | 387.04      |
|                    | $K_{DR} \text{ (mol}^2\text{k J}^{-2}\text{)}$ | 1.0234E-5   |
|                    | $E_a \text{ (kJ/mol)}$                         | 31.4        |
|                    | Reduced Chi-Sqr                                | 2720.32832  |
|                    | Residual Sum of Squares                        | 43525.25312 |
|                    | R-Square (COD)                                 | 0.87013     |
|                    | $R^2$                                          | 0.86201     |
| Temkin             | $b_T \text{ (J/mol)}$                          | 25.2        |
|                    | $K_T \text{ (L/mol)}$                          | 0.807       |
|                    | Reduced Chi-Sqr                                | 130.51897   |
|                    | Residual Sum of Squares                        | 2088.30349  |
|                    | R-Square (COD)                                 | 0.99377     |
|                    | $R^2$                                          | 0.99338     |
| Jossens            | $K$                                            | 35.16       |

|      |                         |           |
|------|-------------------------|-----------|
|      | J                       | 0.092     |
|      | Reduced Chi-Sqr         | 40.9289   |
|      | Residual Sum of Squares | 613.93353 |
|      | R-Square (COD)          | 0.99817   |
|      | R <sup>2</sup>          | 0.99792   |
| Toth | q <sub>m</sub>          | 528.62    |
|      | K <sub>T</sub> (L/mg)   | 9.2       |
|      | <i>t</i>                | 0.844     |
|      | Reduced Chi-Sqr         | 37.29076  |
|      | Residual Sum of Squares | 559.36138 |
|      | R-Square (COD)          | 0.99833   |
|      | R <sup>2</sup>          | 0.99811   |

Table S8: Models of adsorption kinetic parameters of Cr(VI) ions on La-Rb-MOF/CS-PCL.

| Model                       | Value of parameters                                     |             |
|-----------------------------|---------------------------------------------------------|-------------|
| Pseudo-First-order kinetic  | $K_1 (\text{min}^{-1}) \times 10^{-2}$                  | 0.969       |
|                             | Reduced Chi-Sqr                                         | 15.16423    |
|                             | Residual Sum of Squares                                 | 288.12032   |
|                             | R-Square (COD)                                          | 0.99921     |
|                             | R <sup>2</sup>                                          | 0.99916     |
| Pseudo-second-order kinetic | $K_2 (\text{g mg}^{-1} \text{min}^{-1}) \times 10^{-2}$ | 3.97E-5     |
|                             | q <sub>e</sub> (mg/g)                                   | 452.4       |
|                             | Reduced Chi-Sqr                                         | 743.43356   |
|                             | Residual Sum of Squares                                 | 14125.23764 |
|                             | R-Square (COD)                                          | 0.96629     |
|                             | R <sup>2</sup>                                          | 0.96452     |
| Intraparticle diffusion     | K <sub>i</sub> (mgg <sup>-1</sup> min <sup>1/2</sup> )  | 48.72       |
|                             | X (mg/g)                                                | 68.6        |

|                   |                                                  |              |
|-------------------|--------------------------------------------------|--------------|
|                   | Reduced Chi-Sqr                                  | 461.41148    |
|                   | Residual Sum of Squares                          | 460950.06723 |
|                   | R-Square (COD)                                   | 0.96461      |
|                   | R <sup>2</sup>                                   | 0.96461      |
| Elovich           | $\beta$ (g/mg)                                   | 142.05       |
|                   | $\alpha$ (mgg <sup>-1</sup> .min <sup>-1</sup> ) | 0.00179      |
|                   | Reduced Chi-Sqr                                  | 148.89259    |
|                   | Residual Sum of Squares                          | 2828.95928   |
|                   | R-Square (COD)                                   | 0.9922       |
|                   | R <sup>2</sup>                                   | 0.99179      |
| Experimental data | q <sub>e</sub> (exp) (mmol/g)                    | 453.6        |

Table S9: The thermodynamic parameters.

| T (K) | $\Delta G^\circ$ (kJ/mol) | $\Delta H^\circ$ (kJ/mol) | $\Delta S^\circ$ (J/mol.K) |
|-------|---------------------------|---------------------------|----------------------------|
| 293   | -0.5582                   | 90.8                      | 311.75                     |
| 298   | -2.11708                  |                           |                            |
| 303   | -3.67595                  |                           |                            |
| 308   | -5.23483                  |                           |                            |
| 313   | -6.7937                   |                           |                            |
| 318   | -8.35258                  |                           |                            |

**Table S10:** Analyzing similar adsorbents for the absorption of Cr(VI) ions.

| Adsorbent                                                          | Adsorption capacity (mg/g) | Initial Cr(VI) Conc. (mg/L) | Dosage (g/L) | Contact Time (min) | Ref.        |
|--------------------------------------------------------------------|----------------------------|-----------------------------|--------------|--------------------|-------------|
| 3D hierarchical GO-NiFe LDH                                        | 53.6                       | 50                          | 1            | 60                 | [13]        |
| NiFe-LDHs                                                          | 26.78                      | 25                          | 1            | 120                | [14]        |
| Fe <sub>3</sub> O <sub>4</sub> /GO composite                       | 32.3                       | 50                          | 2            | 150                | [15]        |
| mFeOOH@AC                                                          | 27.2                       | 100                         | 1            | 60                 | [16]        |
| $\alpha$ -FeOOH/carbon microspheres                                | 55.4                       | 20                          | 1            | 30                 | [17]        |
| NiO nanosheets                                                     | 49                         | 25                          | 1            | 100                | [18]        |
| Two-dimensional (2D) Ti <sub>3</sub> C <sub>2</sub> T <sub>x</sub> | 104                        | 50                          | 0.5          | 120                | [19]        |
| Polyethyleneimine                                                  | 243.7                      | 100                         | 0.25         | 60                 | [20]        |
| Cu <sub>0.1</sub> Ni <sub>0.05</sub> O-MX                          | 321.02                     | 100                         | 0.2          | 120                | [21]        |
| NH <sub>2</sub> -Ag-MOF@CSC composite sponge                       | 382.9                      | 50                          | 1            | 120                | [22]        |
| La-Rb/CS/PCL                                                       | 449.5                      | 400                         | 0.8          | 100                | This search |

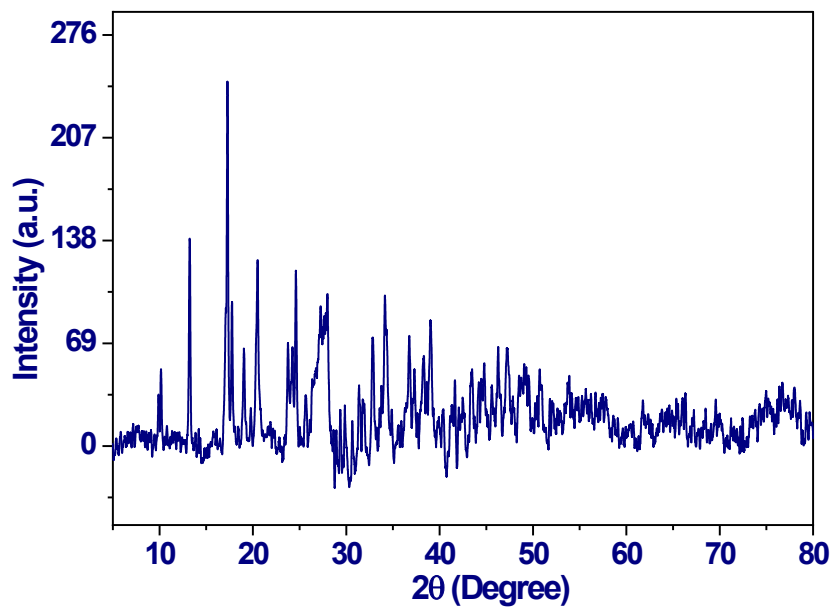

Fig.S1: XRD of La-Rb-MOF

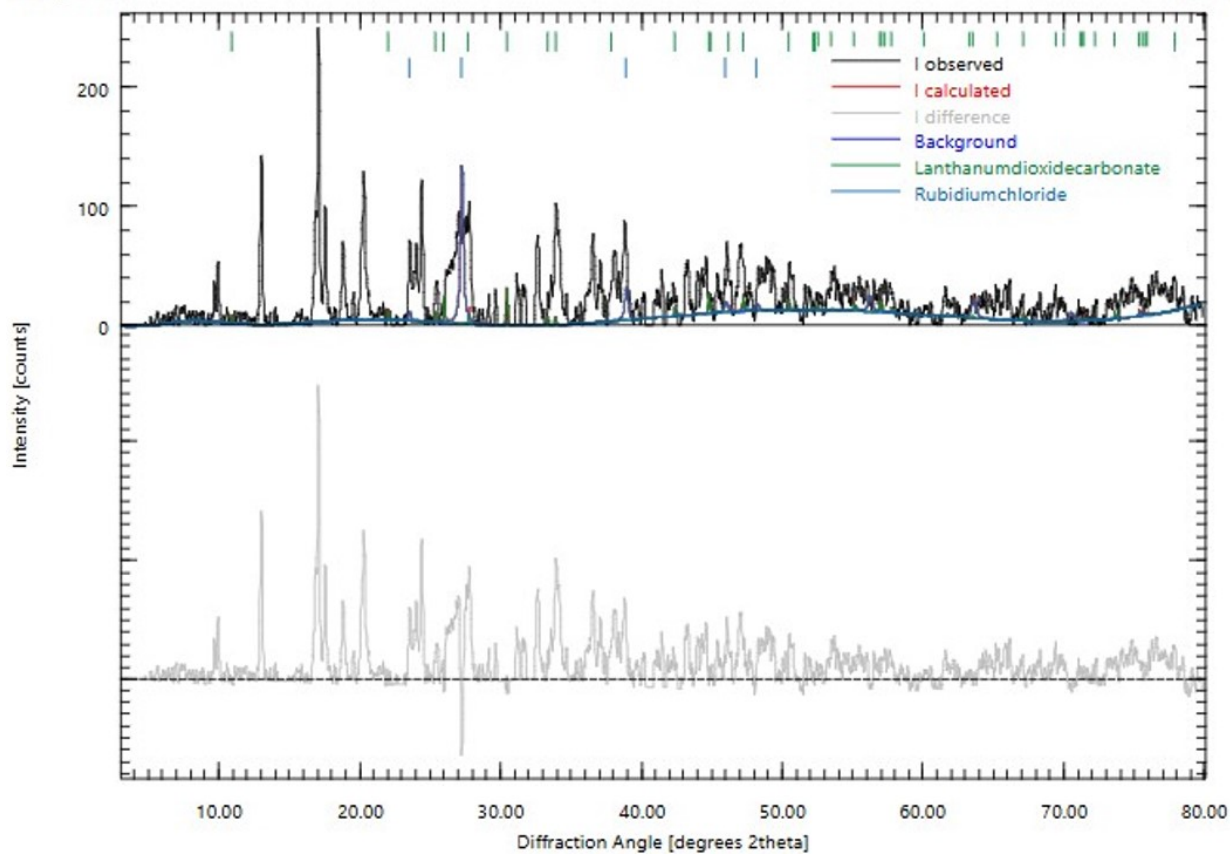

Fig.S2: Powder X-ray Diffraction Pattern and Pawley/Le Bail Refinement Comparison for La-Rb MOF: Experimental versus Simulated Profiles with Phase Assignment

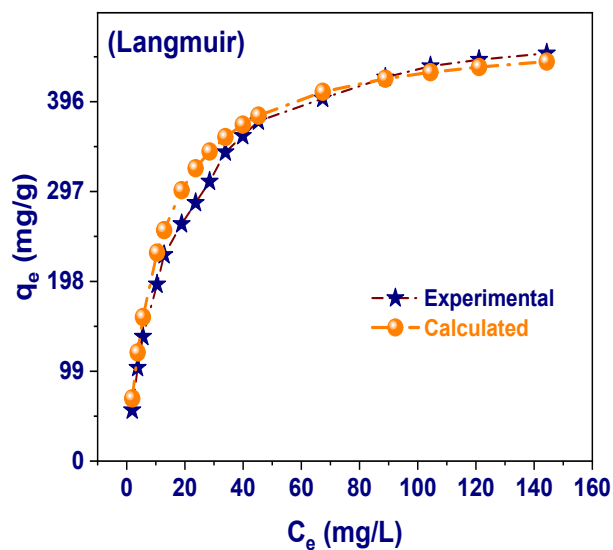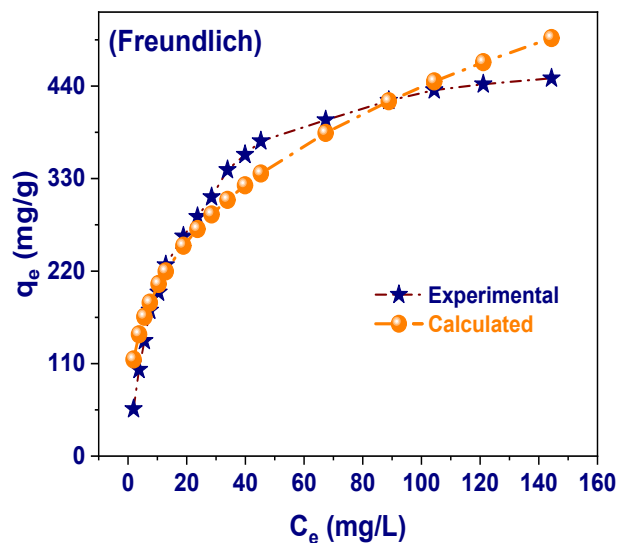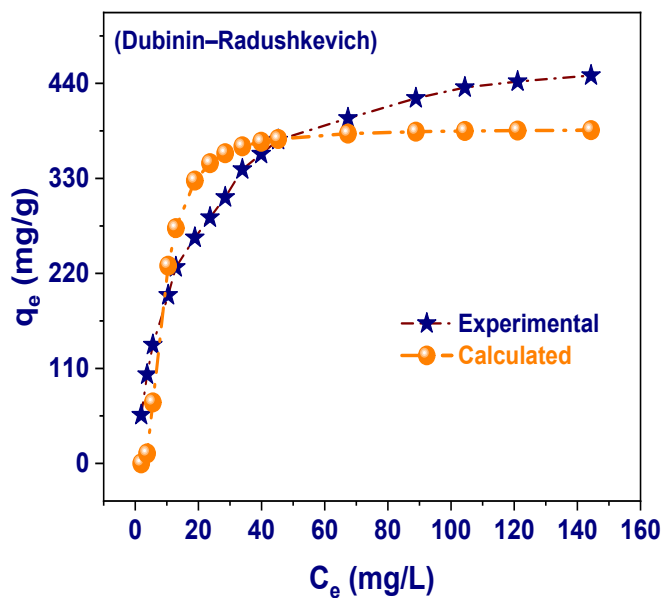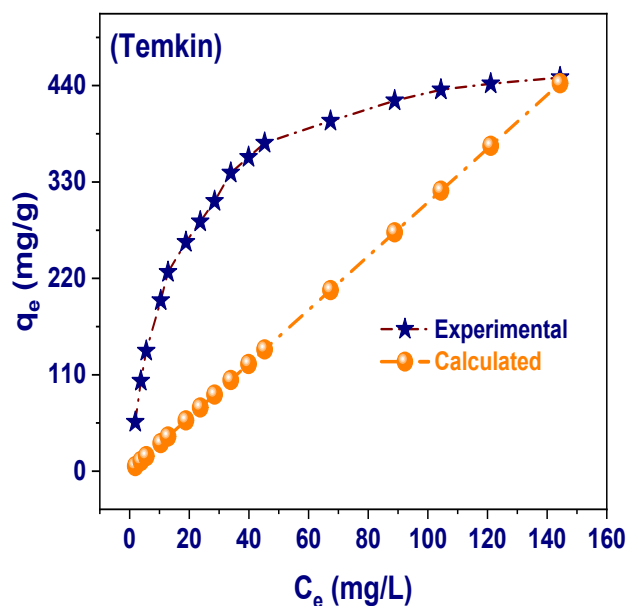

Fig. S3: Adsorption capacity of adsorption isotherm models experimental and calculated

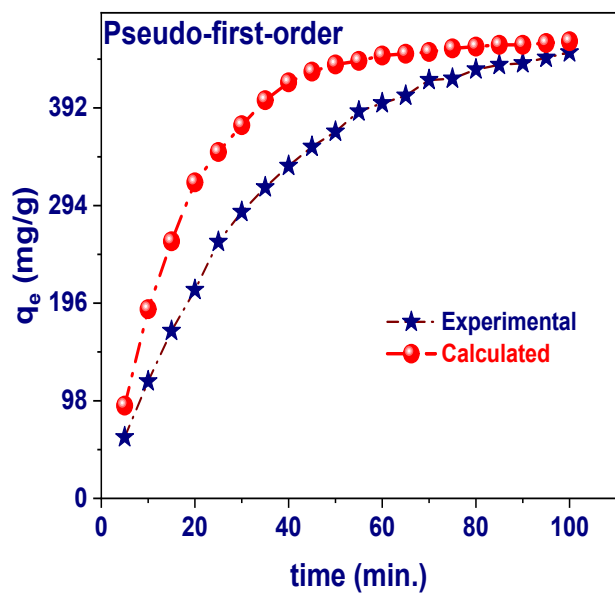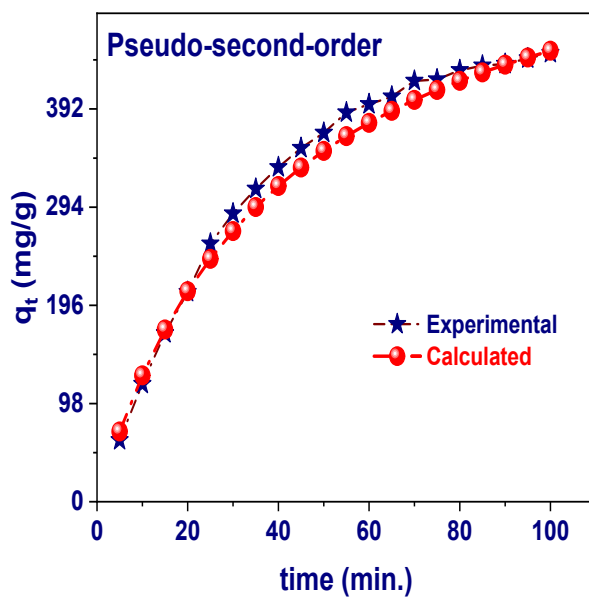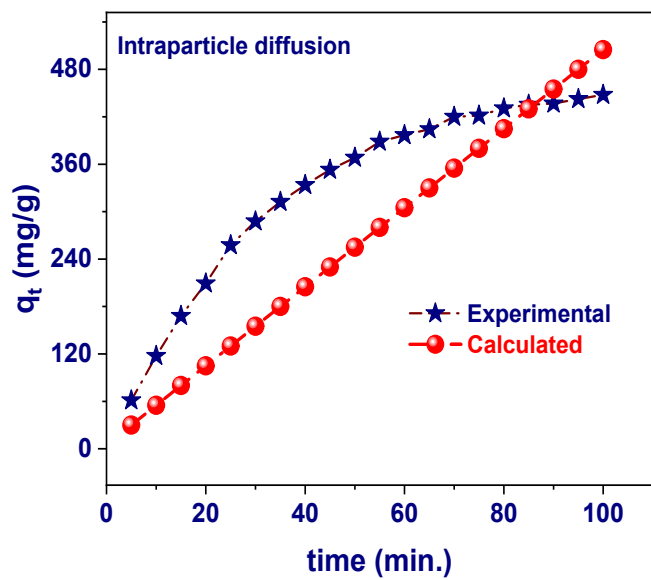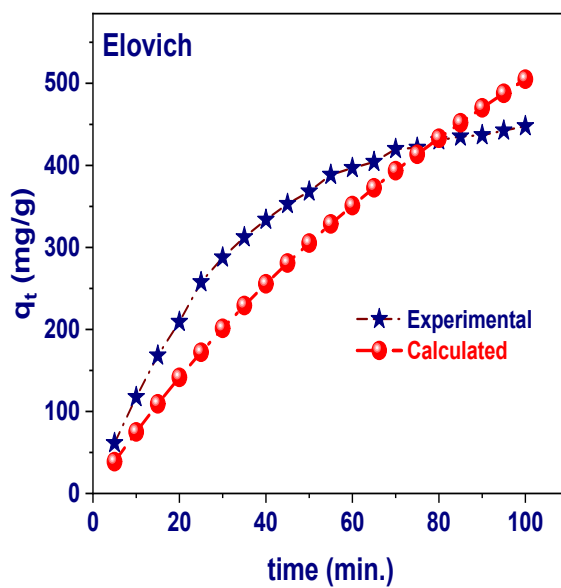

Fig. S4: Adsorption capacity of adsorption kinetic models experimental and calculated

## References

- [1] I. Langmuir, The constitution and fundamental properties of solids and liquids. Part I. Solids, J. Am. Chem. Soc., 38 (1916) 2221-2295.
- [2] H.M.F. Freundlich, Over the adsorption in solution, J. Phys. Chem., 57 (1906) 385-471.
- [3] M. Dubinin, The equation of the characteristic curve of activated charcoal, Proc. Acad. Sci. USSR Phys. Chem. Sect., 55 (1947) 327-329.
- [4] V.P. M.I. Tempkin, Kinetics of ammonia synthesis on promoted iron catalyst, Acta Phys. Chim. USSR, 12 (1940) 327-356.
- [5] D.P. Vargas, L. Giraldo, J.C. Moreno-Piraján, CO<sub>2</sub> adsorption on activated carbon honeycomb-monoliths: a comparison of Langmuir and Toth models, International journal of molecular sciences, 13 (2012) 8388-8397.
- [6] S.K. Lagergren, About the theory of so-called adsorption of soluble substances, Sven. Vetenskapsakad. Handlingar, 24 (1898) 1-39.
- [7] Y.-S. Ho, G. McKay, Sorption of dye from aqueous solution by peat, Chemical engineering journal, 70 (1998) 115-124.
- [8] W.J. Weber Jr, J.C. Morris, Kinetics of adsorption on carbon from solution, J. Sanit. Eng. Div., 89 (1963) 31-59.
- [9] M.H. Dehghani, A. Dehghan, A. Najafpoor, Removing Reactive Red 120 and 196 using chitosan/zeolite composite from aqueous solutions: Kinetics, isotherms, and process optimization, Journal of Industrial and Engineering Chemistry, 51 (2017) 185-195.
- [10] E.C. Lima, A. Hosseini-Bandegharaei, J.C. Moreno-Piraján, I. Anastopoulos, A critical review of the estimation of the thermodynamic parameters on adsorption equilibria. Wrong use of equilibrium constant in the Van't Hoof equation for calculation of thermodynamic parameters of adsorption, Journal of molecular liquids, 273 (2019) 425-434.
- [11] H.N. Tran, S.-J. You, A. Hosseini-Bandegharaei, H.-P. Chao, Mistakes and inconsistencies regarding adsorption of contaminants from aqueous solutions: a critical review, Water research, 120 (2017) 88-116.
- [12] B. Oladipo, E. Govender-Opitz, T.V. Ojumu, Kinetics, thermodynamics, and mechanism of Cu (II) ion sorption by biogenic iron precipitate: using the lens of wastewater treatment to diagnose a typical biohydrometallurgical problem, ACS omega, 6 (2021) 27984-27993.
- [13] Y. Zheng, B. Cheng, W. You, J. Yu, W. Ho, 3D hierarchical graphene oxide-NiFe LDH composite with enhanced adsorption affinity to Congo red, methyl orange and Cr (VI) ions, Journal of hazardous materials, 369 (2019) 214-225.
- [14] Y. Lu, B. Jiang, L. Fang, F. Ling, J. Gao, F. Wu, X. Zhang, High performance NiFe layered double hydroxide for methyl orange dye and Cr (VI) adsorption, J Chemosphere, 152 (2016) 415-422.
- [15] M. Liu, T. Wen, X. Wu, C. Chen, J. Hu, J. Li, X. Wang, Synthesis of porous Fe<sub>3</sub>O<sub>4</sub> hollow microspheres/graphene oxide composite for Cr (VI) removal, J Dalton Transactions, 42 (2013) 14710-14717.
- [16] M. Su, Y. Fang, B. Li, W. Yin, J. Gu, H. Liang, P. Li, J. Wu, Enhanced hexavalent chromium removal by activated carbon modified with micro-sized goethite using a facile impregnation method, J Science of the total environment, 647 (2019) 47-56.
- [17] L. Zhang, F. Fu, B. Tang, Adsorption and redox conversion behaviors of Cr (VI) on goethite/carbon microspheres and akaganeite/carbon microspheres composites, J Chemical Engineering Journal, 356 (2019) 151-160.
- [18] J. Zhao, Y. Tan, K. Su, J. Zhao, C. Yang, L. Sang, H. Lu, J. Chen, A facile homogeneous precipitation synthesis of NiO nanosheets and their applications in water treatment, J Applied Surface Science, 337 (2015) 111-117.



- [19] P. Karthikeyan, K. Ramkumar, K. Pandi, A. Fayyaz, S. Meenakshi, C.M. Park, Effective removal of Cr (VI) and methyl orange from the aqueous environment using two-dimensional (2D) Ti<sub>3</sub>C<sub>2</sub>Tx MXene nanosheets, *J Ceramics International*, 47 (2021) 3692-3698.
- [20] Z. Wu, C. Zhao, W. Zeng, X. Wang, C. Liu, Z. Yu, J. Zhang, Z. Qiu, Ultra-high selective removal of CR and Cr (VI) from aqueous solutions using polyethyleneimine functionalized magnetic hydrochar: Application strategy and mechanisms insight, *J Chemical Engineering Journal*, 448 (2022) 137464.
- [21] S. Adil, J.-O. Kim, Enhanced adsorption performance of a Cu/Ni-MXene composite for phosphate recovery and removal of Cr (VI) from aqueous solutions, *J Separation Purification Technology*, 326 (2023) 124725.
- [22] A.M. Alsuhaibani, A.A. Alayyafi, L.A. Albedair, M.G. El-Desouky, A.A. El-Bindary, Efficient fabrication of a composite sponge for Cr (VI) removal via citric acid cross-linking of metal-organic framework and chitosan: adsorption isotherm, kinetic studies, and optimization using Box-Behnken design, *Materials Today Sustainability*, 26 (2024) 100732.
